# Supplementary material for: Tissue-specific responses to TFAM and mtDNA copy number manipulation in prematurely ageing mice
Source: eLife journal article supplement (doi:10.7554/elife.104461), 2025-02-12
Supplement: fig2-figsupp1-data4 [file elife-104461-fig2-figsupp1-data4-v1.pdf]

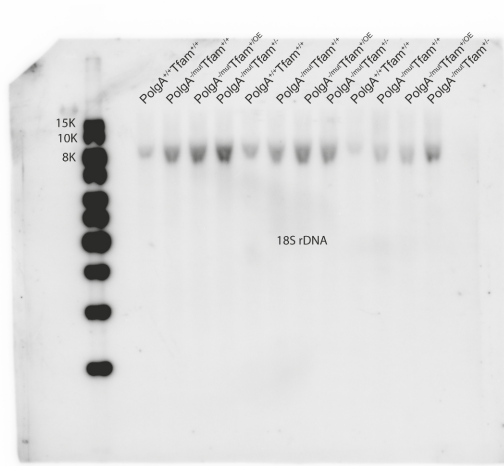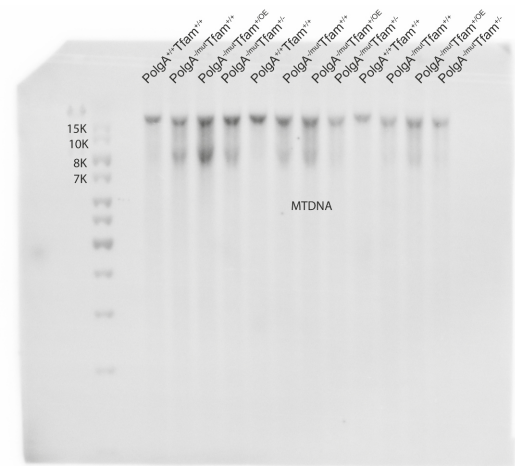

**Figure 2 - Figure supplement 1 - Source data 4**

Southern blot analysis for Figure 2 - Figure supplement 1B, indicating relevant bands in kilo basepairs (K)
