# Supplementary material for: Tissue-specific responses to TFAM and mtDNA copy number manipulation in prematurely ageing mice
Source: eLife journal article supplement (doi:10.7554/elife.104461), 2025-02-12

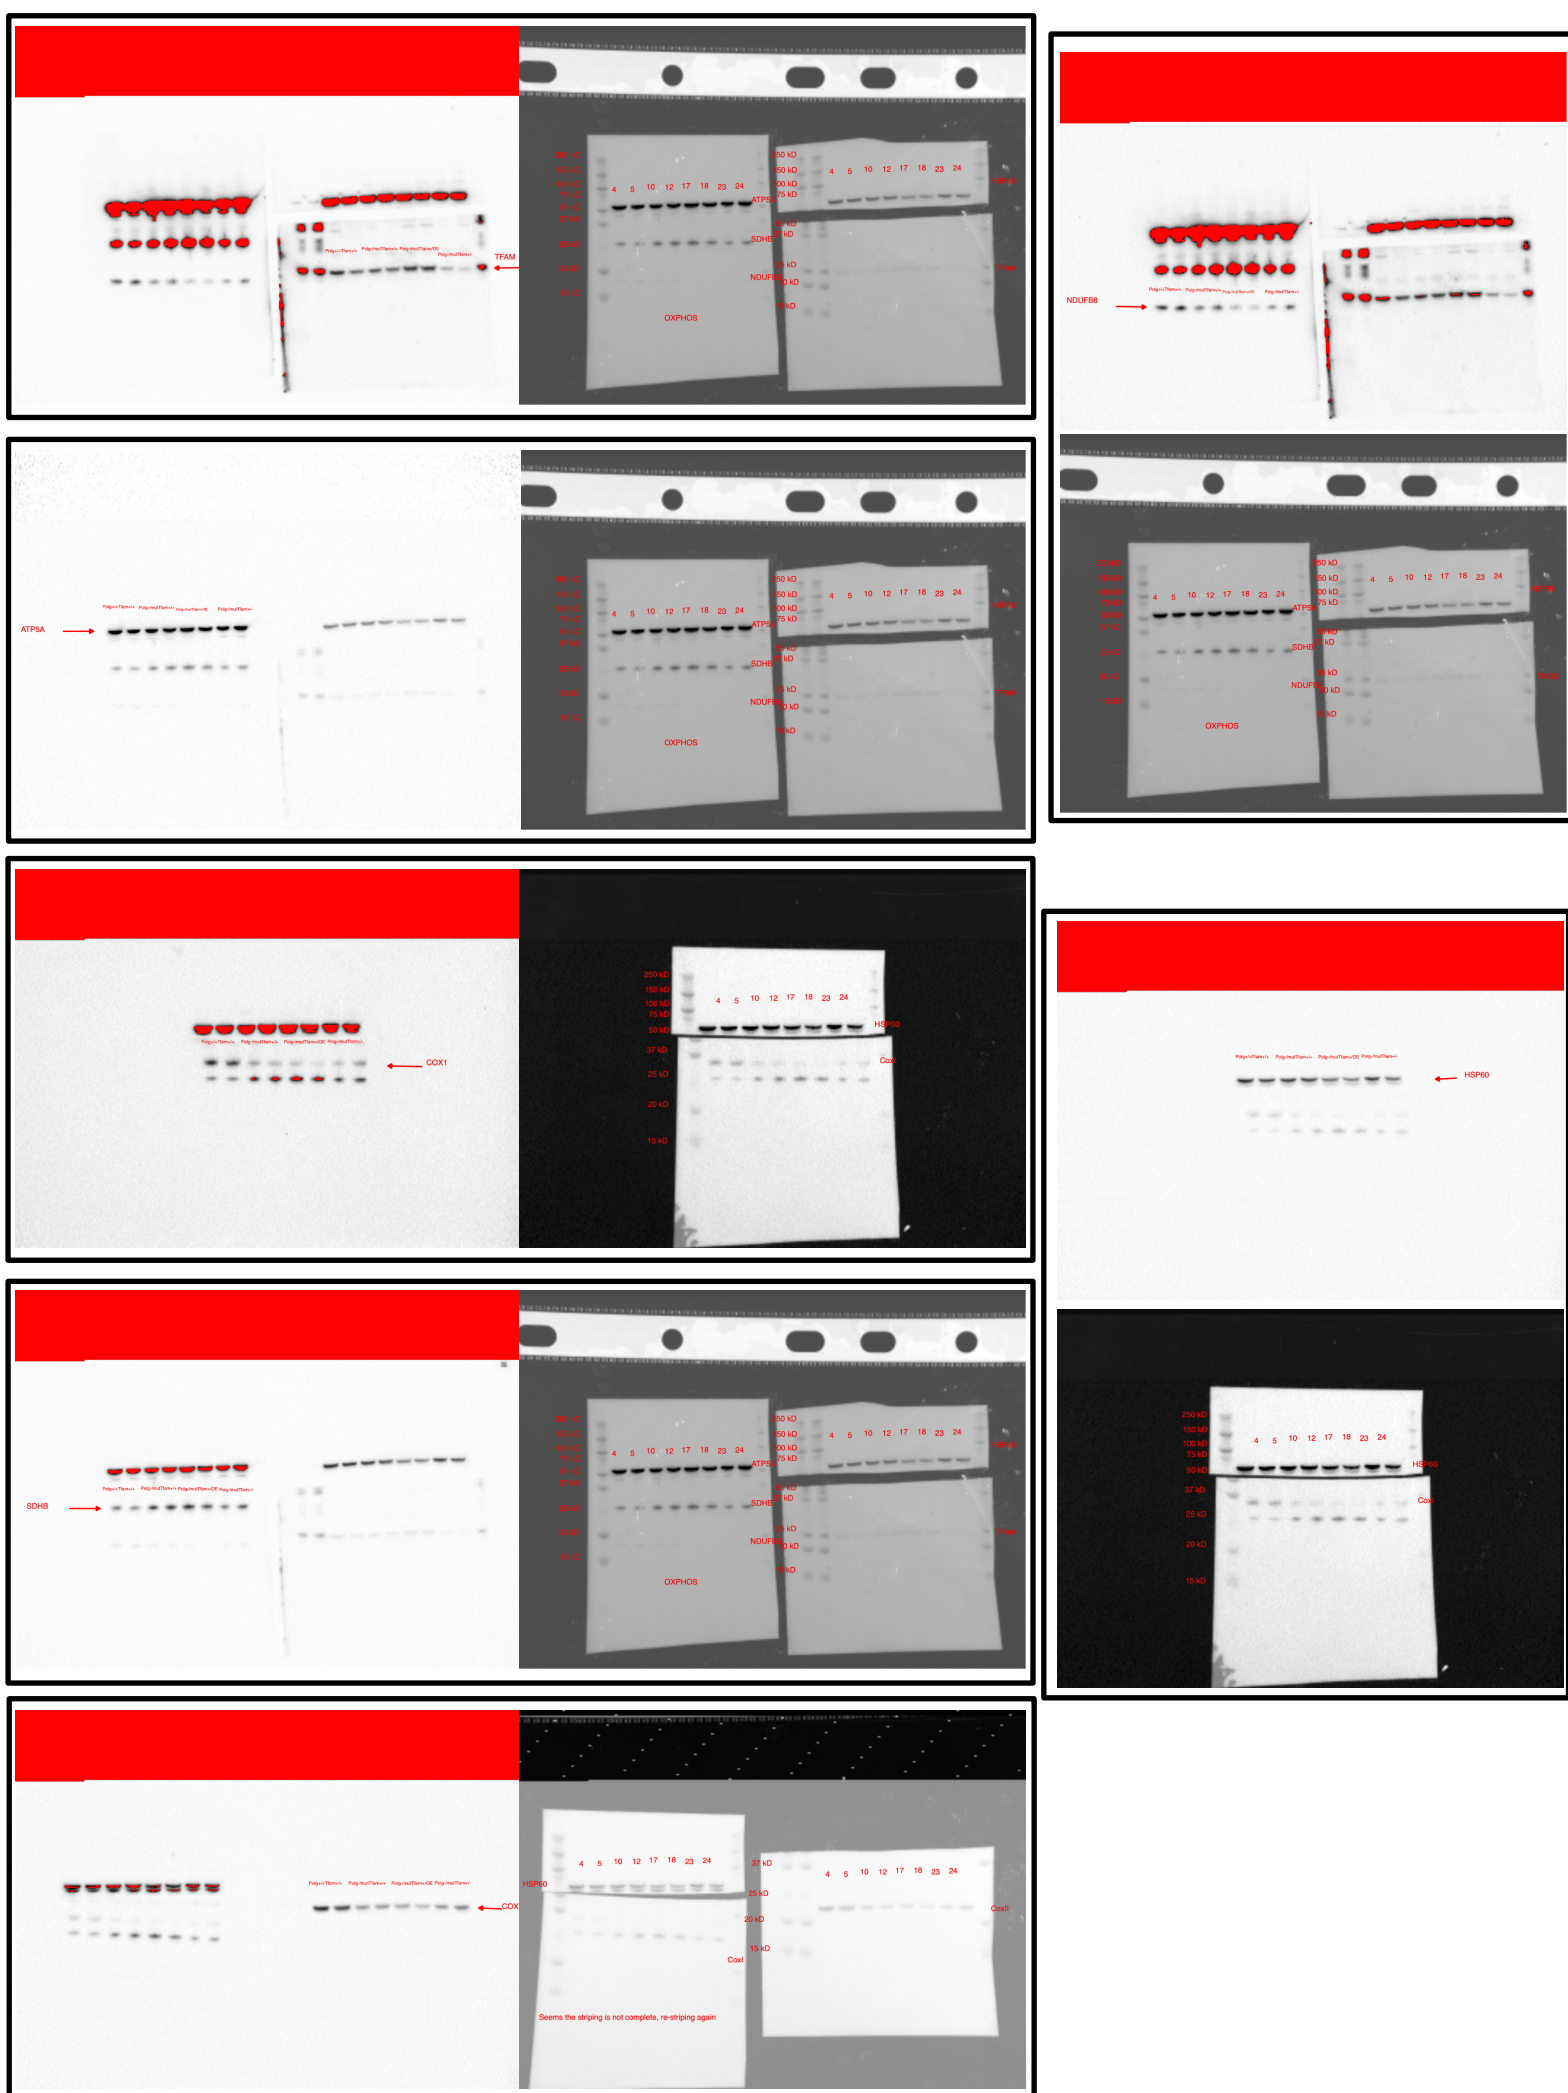

Supplement: fig3-data3 [file elife-104461-fig3-data3-v1.pdf]
