# Supplementary material for: Tissue-specific responses to TFAM and mtDNA copy number manipulation in prematurely ageing mice
Source: eLife journal article supplement (doi:10.7554/elife.104461), 2025-02-12
Supplement: fig5-data5 [file elife-104461-fig5-data5-v1.pdf]

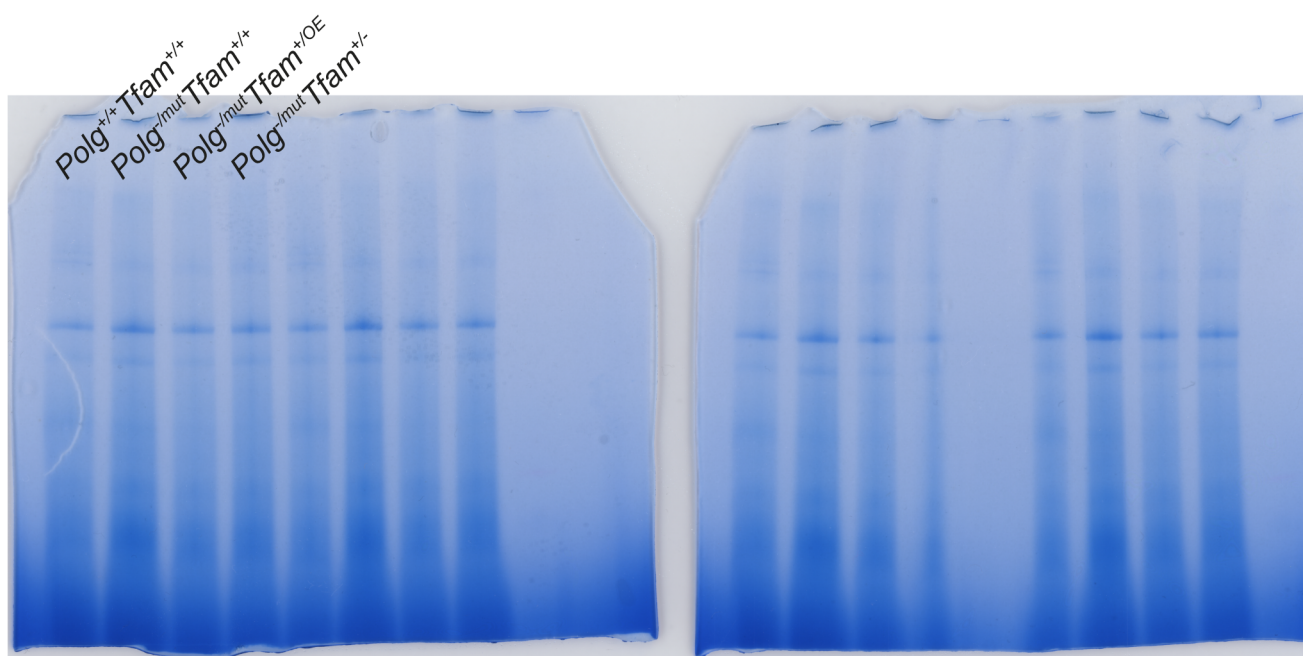

Commassie

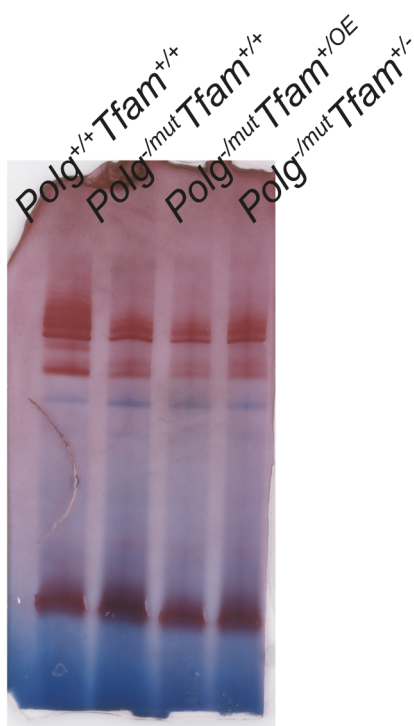

Complex I  
in gel activity

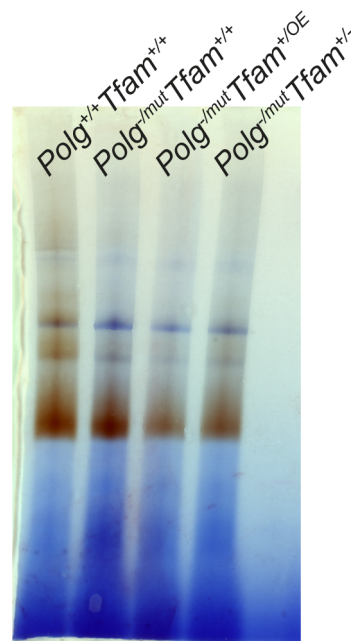

Complex IV  
in gel activity

**Figure 5 - Source data 5**  
 BN-PAGE analysis of Figure 5C, labeled
