# Supplementary material for: Tissue-specific responses to TFAM and mtDNA copy number manipulation in prematurely ageing mice
Source: eLife journal article supplement (doi:10.7554/elife.104461), 2025-02-12
Supplement: fig6-data3 [file elife-104461-fig6-data3-v1.pdf]

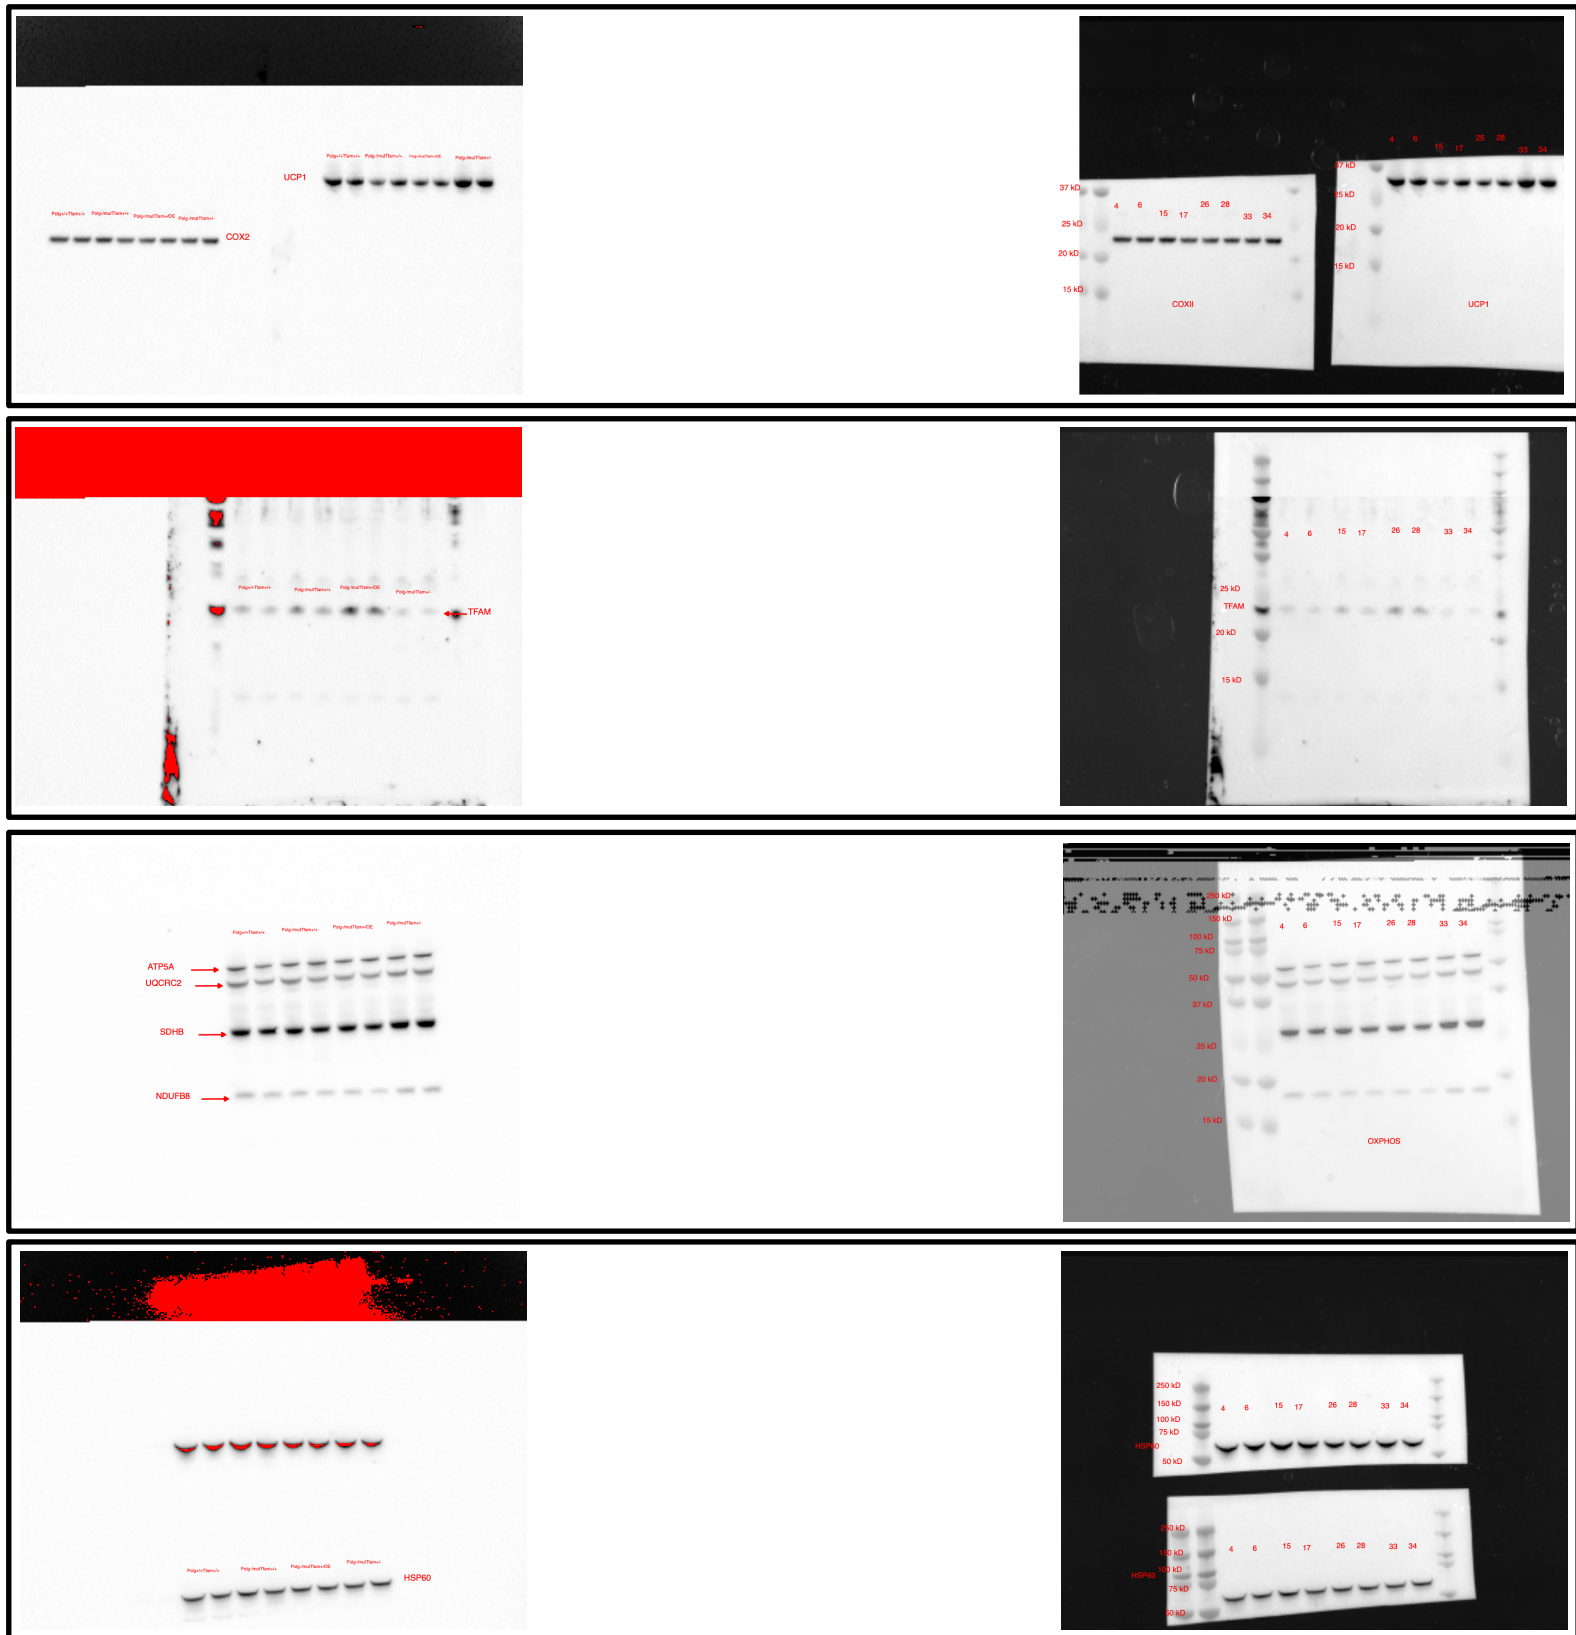

**Figure 6 - Source data 3**

Western blot analysis of Figure 6B, boxes indicating associated images, relevant bands in kilo Dalton (kD)
