# Supplementary material for: Tissue-specific responses to TFAM and mtDNA copy number manipulation in prematurely ageing mice
Source: eLife. 2025 Jun 30;14:RP104461. doi: 10.7554/eLife.104461 (PMC12208663; doi:10.7554/eLife.104461)
Supplement: Figure 2—figure supplement 1—source data 1. [file elife-104461-fig2-figsupp1-data1.xlsx]

## Sheet: Fig2Supplement1.A
mt-Cytb
Polg+/+Tfam+/+	Polg-/mutTfam+/+	Polg-/mutTfam+/OE	Polg-/mutTfam+/-
0.664441	8.21635	4.17695	3.37669
0.875604	4.79754	4.03879	4.33746
2.31354	3.75669	6.85985	4.32054
0.77983	5.27455	11.6034	5.34479
0.425697	4.92156	3.28257	7.17616
1.5698	4.28619	6.9689	5.88031
0.686784	5.57648	6.70223
0.79794	4.66245	8.3049
0.513419	2.61842
0.748327	3.34701
1.07194	3.82096
1.55268	4.79296
	5.07514
