# Supplementary material for: Tissue-specific responses to TFAM and mtDNA copy number manipulation in prematurely ageing mice
Source: eLife. 2025 Jun 30;14:RP104461. doi: 10.7554/eLife.104461 (PMC12208663; doi:10.7554/eLife.104461)
Supplement: Figure 2—source data 1. [file elife-104461-fig2-data1.xlsx]

## Sheet: 2.B
	Polg+/+Tfam+/+															PolgA-/mutTfam+/+															PolgA-/mutTfam+/OE															PolgA-/mutTfam+/-
mt-Nd1	1.02389	1.19856	1.16348	1.45113	0.568143	1.46065	0.423423	0.356344	0.937243	1.52497	0.892168					1.00574	1.0584	0.528825	1.06159	1.10776	0.848956	2.49338	1.34749	0.970822	1.679	0.577105					1.21605	0.515023	1.38261	1.96824	0.571966	1.0864	0.841341									0.730552	0.395536	1.05586	1.00743
mt-Atp6	0.78092	1.4266	0.876819	1.51568	0.407688	1.53065	0.339724	0.310804	0.88312	2.1156	0.812392					2.07319	2.07205	0.873381	1.51698	1.82859	1.11715	3.1994	1.68079	1.17438	1.63842	0.918953					2.30556	0.844124	3.29585	4.14542	1.04197	2.17979	2.47112									1.10914	0.998606	1.88348	1.17626
mt-Cytb	1.0416	1.19598	1.18739	1.46586	0.599374	1.41285	0.419572	0.358061	1.02648	1.42189	0.870945					1.63914	1.64711	0.819135	1.77589	1.56001	1.55201	4.77129	2.10155	1.44987	2.85434	1.01569					2.37697	1.01845	2.32871	3.3326	1.09137	1.91794	1.53351									1.3925	0.644601	1.72434	1.43311
[truncated: 1 more columns]

## Sheet: 2.C
	Polg+/+Tfam+/+															PolgA-/mutTfam+/+															PolgA-/mutTfam+/OE															PolgA-/mutTfam+/-
mt-Nd1	1.11997	1.52225	1.18702	1.07163	1.01488	0.772491	0.999792	0.71306	0.994606	0.870557	0.73376					1.21309	0.793192	2.65244	0.798918	1.10325	2.29738	3.65458	1.36614	1.79994	2.07138	0.839537					2.0644	3.41419	1.46091	1.36534	1.68553	1.0295	1.96764									1.12408	0.526782	0.478427	0.648279
mt-Atp6	1.08291	1.6703	0.938063	1.03097	0.846251	1.02293	0.98222	0.69895	0.783087	1.25494	0.689372					2.03582	0.842542	2.94207	0.930204	1.2926	1.93859	2.56002	1.50544	1.85099	2.30909	1.22705					2.19133	3.6433	1.7766	1.42101	2.08817	1.72329	3.56179									1.17946	1.20663	0.700923	0.65847
mt-Cytb	1.40683	1.44222	1.38648	1.19881	1.2169	0.804027	0.863084	0.301875	0.712589	0.906941	0.760245					2.2697	1.78533	2.90545	2.13036	1.60307	3.35479	6.1228	2.28454	3.50931	5.8631	1.91247					3.10815	7.14949	2.10129	1.71555	2.00803	3.75459	3.39492									1.94354	1.06035	1.06981	1.74182
[truncated: 1 more columns]

## Sheet: 2.D
	Polg+/+Tfam+/+																PolgA-/mutTfam+/+																PolgA-/mutTfam+/OE
mt-Nd1	0.748167	1.06457	0.982982	0.798966	1.16391	1.13985	0.669479	0.497302	0.62845	2.50126	1.16345	1.3677	0.886774	0.384549	1.00259		1.21152	1.51913	1.19602	0.868307	0.708601	2.4834	0.956566	0.568241	1.56699	1.87921	0.772172	1.40187	1.25919	1.70538	2.2195		0.797414	0.959618	1.25766	2.7419	1.13392	1.63988	1.08303	0.928018	2.1053	3.94456	4.10046	1.3722	2.19551	3.6643	1.32045	1.87707
mt-Atp6	0.732892	1.12262	0.676442	0.838517	1.13108	1.1888	0.702499	0.533801	0.524678	2.58266	1.23027	1.48914	0.91957	0.343763	0.983268		1.20793	2.34982	1.46064	1.06529	1.12306	3.24406	1.0963	0.723711	1.90345	1.69716	0.992832	1.38162	1.75497	2.63236	2.78865		1.07649	1.69958	1.65538	3.44905	1.38541	2.00106	0.884817	1.1738	2.9882	5.79538	5.49613	2.1408	2.89346	4.74639	2.04234	2.46321
mt-Cytb	0.739426	1.1869	1.07464	0.749358	1.18466	1.10602	0.653573	0.49487	0.518499	2.46684	1.20178	1.54213	0.889435	0.254942	0.936928		1.45382	2.39039	1.54497	1.10123	0.843773	3.59161	1.16146	0.726069	2.11358	1.86472	0.949596	1.45107	1.64683	2.64954	2.54442		1.00493	1.56989	2.01322	3.06617	1.35064	2.01244	1.40608	1.00686	2.38332	6.38999	5.7035	1.66385	2.89321	5.20201	1.72702	2.49552
[truncated: 9 more columns]

## Sheet: 2.E
	Polg+/+Tfam+/+																PolgA-/mutTfam+/+																PolgA-/mutTfam+/OE																PolgA-/mutTfam+/-
mt-Nd1	1.73329	0.366851	1.20339	0.678844	0.824648	1.19297											1.70809	1.63523	0.99193	1.28221	1.65649	1.12831											2.73509	2.16151	2.03524	4.49875	2.72391	2.87348	3.77838										0.867893
mt-Atp6	1.70286	0.351177	1.15721	0.668625	0.831195	1.28893											2.11294	2.18557	1.23174	1.85125	2.10945	1.41234											3.94105	3.08053	2.61926	6.28099	4.24009	4.23986	4.58035										1.22221
mt-Cytb	2.09261	0.402844	1.12043	0.591554	0.708121	1.08444											2.24684	1.85465	1.23833	1.45677	2.12401	1.26323											3.40433	2.55572	2.23533	5.84377	3.44685	3.45538	5.46946										1.02476
[truncated: 4 more columns]

## Sheet: 2.F
	Polg+/+Tfam+/+																PolgA-/mutTfam+/+																PolgA-/mutTfam+/OE																PolgA-/mutTfam+/-
mt-Nd1	0.988792	0.892148	0.929593	1.16163	1.2337	0.794129		0.763931	0.930136	1.2955	0.833073	0.737909	1.43945				1.81712	0.928351	1.44827	1.20781	1.32963	1.69539		1.28566	0.70834	1.70706	1.10077	1.86803	0.73332				1.89339	3.65881	2.91217	2.8122	2.59087	2.98159	1.70827	3.07485	2.47515	2.67495	2.41248	1.71536	1.31541	1.24791			1.52525
mt-Atp6	1.05432	0.864871	1.00436	1.0897	1.22319	0.76355		0.822331	0.943605	1.19541	0.739519	0.720095	1.57904				3.43286	1.28852	2.40095	1.97216	2.48513	2.76959		2.08104	1.09269	2.66023	1.94487	3.2246	1.28552				3.0139	6.40543	4.69743	3.73883	4.34702	5.09675	2.46846	4.92685	3.51457	3.70861	3.50513	2.60398	1.82743	1.81411			2.87812
mt-Cytb	1.22088	0.891028	0.973717	1.04677	1.1027	0.764905		0.859079	1.15178	1.17354	0.670292	0.650609	1.49471				5.23804	1.79191	3.49103	2.60975	4.02193	3.80647		3.17083	1.27179	3.35163	2.48262	4.33149	1.84915				3.76685	8.27159	5.18588	4.29525	4.90636	6.07384	3.03987	5.04503	3.81812	3.87679	3.98854	3.08627	1.72891	1.7874			3.93527
[truncated: 9 more columns]
