# Supplementary material for: Tissue-specific responses to TFAM and mtDNA copy number manipulation in prematurely ageing mice
Source: eLife. 2025 Jun 30;14:RP104461. doi: 10.7554/eLife.104461 (PMC12208663; doi:10.7554/eLife.104461)
Supplement: Figure 3—source data 1. [file elife-104461-fig3-data1.xlsx]

## Sheet: 3.A
	Polg+/+Tfam+/+													PolgA-/mutTfam+/+														PolgA-/mutTfam+/OE													PolgA-/mutTfam+/-
mt-Nd1	0.981895	0.599704	1.02005	1.1344	1.31463	0.976655	0.893867	0.755436	1.27598	1.08957	1.12923	0.828575		1.55735	0.963581	1.26679	1.3346	1.17613	1.10423	0.618851	1.52076	1.16301	1.25277	1.37053	0.781024	1.00643		1.14355	1.21851	1.19958	1.29529	1.57912	1.6678	1.1222	0.757251						1.34229	0.97866	0.879676	1.17409	1.12148	1.14879	0.997725
mt-Atp6	1.04044	0.690967	1.12265	1.0249	1.20208	0.924301	0.879722	0.684467	1.23011	1.10338	1.25195	0.845012		1.38278	0.857453	1.00397	1.16313	1.11133	0.953819	0.540805	1.17083	0.805844	0.926666	0.845878	0.9019	0.923964		0.574309	0.629014	0.788775	0.715658	1.13705	0.862748	0.727535	0.506154						1.24424	0.983453	0.922042	1.17657	1.12232	1.19581	0.85506
mt-CytB	0.900224	0.407127	0.982129	1.14543	1.40899	1.05487	0.869205	0.621612	1.36209	1.07575	1.32792	0.844654		1.1257	0.75938	1.06699	1.01406	0.983777	0.871405	0.484457	1.17672	0.858738	0.945386	0.9442	0.894361	0.863708		0.355979	0.491903	0.626511	0.672448	1.06717	0.648134	0.583151	0.367474						1.25433	0.987153	0.765446	1.01349	1.18904	1.28416	0.893781

## Sheet: 3.D
	Polg+/+Tfam+/+																PolgA-/mutTfam+/+																PolgA-/mutTfam+/OE																PolgA-/mutTfam+/-
Atf4	0.772276	0.834867	0.930373	0.814316	1.10028	0.899288	1.02931	1.43177	1.3169	0.821701	1.0656	0.983323					1.41841	0.727653	1.25679	1.16847	1.03598	1.17053	0.646185	0.91086	1.06508	1.14287	0.767662	1.037	1.57712				1.22595	0.994749	0.890117	1.19611	0.974787	1.05751	1.18126	0.850727									1.37683
Atf5	0.938863	0.957654	0.95383	0.941473	0.497366	1.12734	0.572303	1.70005	1.55703	1.14468	0.554604	1.05481					1.56832	0.762887	1.24337	1.13172	0.797005	1.53516	1.17436	1.02426	1.06323	1.20951	1.29479	1.06335	2.38677				2.123	1.41429	1.06625	0.892494	1.39166	0.994242	1.15555	1.16454									0.83629
Mthfd2	0.796097	0.792321	0.705316	0.686402	0.654773	1.24668	1.0582	2.35388	1.33972	0.643791	0.725233	0.997584					3.19307	2.55489	2.65228	2.76539	2.81774	2.47253	3.56442	3.06019	2.94794	2.90303	3.39627	2.46588	3.64961				3.98103	3.28161	2.37565	2.41505	1.94215	2.27991	2.68668	3.11477									2.84127
[truncated: 6 more columns]

## Sheet: 3.E
FGF21
Polg+/+Tfam+/+	Polg-/mutTfam+/+	Polg-/mutTfam+/OE	Polg-/mutTfam+/-
38.256	2172.58	2404.66	665.776
18.0244	3998.06	5868.58	1514.44
423.302	1143.8	319.385
	870.147	5549.9
		1687.63
499.509	1607.96	3495.8
115.014	1798.48	2564
		2986.6
851.611	869.259	1334.07	26.472
163.761	2904.72	2613.57	177.152
701.782	470.851	3114.14	731.348
50.2675	463.189	2971.12	8.5947
176.53	675.163	2210.06	1466.87
323.805	1004.62	613.869	197.583
698.377	2460.34	2904.72	3941.6
456.608	1630.32	2978.78
