# Supplementary material for: Tissue-specific responses to TFAM and mtDNA copy number manipulation in prematurely ageing mice
Source: eLife. 2025 Jun 30;14:RP104461. doi: 10.7554/eLife.104461 (PMC12208663; doi:10.7554/eLife.104461)
Supplement: Figure 4—source data 1. [file elife-104461-fig4-data1.xlsx]

## Sheet: 4.A
	Polg+/+Tfam+/+													PolgA-/mutTfam+/+														PolgA-/mutTfam+/OE													PolgA-/mutTfam+/-
mt-Nd1	0.90129	0.863197	1.81466	1.06167	1.15203	0.906398	0.74848	0.578072	0.68631	0.574297	0.93955	1.77405		0.533	0.465692	0.373309	0.712918	0.560419	0.98241	0.659405	0.661401	0.749415	0.491563	0.493998	0.683723	0.456476		0.586565	0.548493	0.787913	0.749142	0.881511	0.967137	0.630698	0.53082						0.587177	0.512103	0.431922	0.346669	0.425511	0.592666	0.708237
mt-Atp6	0.987198	0.895759	1.66597	1.1572	1.18975	0.888206	0.658298	0.576462	0.58383	0.475003	1.03383	1.88849		0.395673	0.387775	0.280415	0.673213	0.507687	0.86562	0.512297	0.489475	0.610303	0.348693	0.363568	0.63964	0.38068		0.407279	0.339715	0.549208	0.406013	0.544953	0.784225	0.536402	0.432916						0.401052	0.389431	0.330786	0.240843	0.319643	0.402729	0.526782
mt-CytB	0.857032	0.655601	1.72694	1.13171	1.16512	0.889266	0.524167	0.475858	0.547623	0.385715	0.86065	2.78032		0.379673	0.335263	0.200802	0.582472	0.393661	1.2451	0.522898	0.601811	0.770206	0.413969	0.375669	0.712534	0.401516		0.321316	0.22674	0.520104	0.340075	0.457964	0.84347	0.522266	0.31813						0.488159	0.484008	0.38383	0.244496	0.365415	0.585069	0.877717

## Sheet: 4.C
	Polg+/+Tfam+/+																PolgA-/mutTfam+/+																PolgA-/mutTfam+/OE																PolgA-/mutTfam+/-
Atf4	1.21922	0.842779	0.716107	0.967411	1.42114	0.839116	1.71578	0.969313	1.00421	1.12874	0.916197	0.259984					0.876356	1.02951	0.803891	1.28893	1.04881	0.729934	0.957447	0.949658	1.06109	0.944336	1.69536	0.879998	0.841273				1.24584	0.561727	1.0393	1.26266	1.55578	1.49611	1.00969	0.913283									0.9947
Atf5	1.06436	0.952563	0.431518	0.804837	0.820504	0.846474	2.26376	1.40515	0.91843	1.53322	0.801131	0.15804					1.74179	1.05636	1.93635	1.29027	1.34036	0.668383	1.59343	1.16003	1.15644	0.976148	0.935652	1.0823	1.10198				1.96088	2.72042	1.92298	2.09933	1.38597	1.04132	1.51665	1.20242									1.28844
Mthfd2	1.24728	0.850409	0.628822	1.34442	0.967949	0.979991	1.76283	1.32327	0.853078	0.865682	0.867649	0.308628					3.90081	7.08547	5.20201	5.8913	6.03051	1.93618	2.48336	5.22639	2.86601	2.48355	4.76843	5.82804	3.02498				6.82302	6.74163	3.51569	8.33859	5.57098	4.63034	6.47148	3.72388									2.87669
Anf	0.983758	0.987257	0.191855	4.81235	0.723643	0.538408	0.375661	0.314065	0.43412	1.14086	0.452134	1.04589					3.31932	6.79406	1.3978	4.25501	4.31584	2.12956	11.1927	2.37739	4.80283	6.22967	1.67833	9.76681	0.803668				3.71705	4.04947	1.95354	11.9809	5.01956	4.31315	4.1058	0.82835									0.106119
[truncated: 6 more columns]
