# Supplementary material for: Tissue-specific responses to TFAM and mtDNA copy number manipulation in prematurely ageing mice
Source: eLife. 2025 Jun 30;14:RP104461. doi: 10.7554/eLife.104461 (PMC12208663; doi:10.7554/eLife.104461)
Supplement: Figure 5—source data 1. [file elife-104461-fig5-data1.xlsx]

## Sheet: 5.A
	Polg+/+Tfam+/+																PolgA-/mutTfam+/+																PolgA-/mutTfam+/OE																PolgA-/mutTfam+/-
mt-Nd1	0.974725	1.08745	0.775652	1.0755	1.00423	0.679098	1.13442	1.26893									2.79328	2.40898	2.17243	2.38691	1.90089	1.52729	1.77122										0.939228	2.62531	2.52916	1.55086	1.84052	1.14003	1.15546	1.24746									1.82197
mt-Atp6	1.08605	1.19957	0.69998	1.15898	0.979507	0.63587	1.09944	1.1406									1.93823	1.5606	1.52051	1.71801	1.10899	0.958481	1.39579										0.428971	1.55359	1.54289	0.803038	1.07391	0.561221	0.564399	0.688828									1.26329
mt-CytB	0.898737	1.1312	0.589203	1.16976	0.972633	0.680996	1.20713	1.35034									2.32591	1.88914	1.61284	1.95799	1.20814	1.03527	1.35974										0.304891	1.33771	1.48571	0.724417	0.995784	0.482823	0.409634	0.603934									1.34342
[truncated: 7 more columns]

## Sheet: 5.E
	Polg+/+Tfam+/+																PolgA-/mutTfam+/+																PolgA-/mutTfam+/OE																PolgA-/mutTfam+/-
Atf4	1.18187	0.917865	0.829711	1.47685	0.940867	0.534892	1.41856	1.05142	0.744241	0.903722							1.54596	0.986828	1.76747	1.21915	0.518141	1.14592	0.986528	0.153618	1.51864	1.13402							0.716325	1.64834	1.01114	0.730274	1.86932	0.876329	0.868818	0.636078	0.549602	1.68734							1.44004
Atf5	1.13615	0.767163	1.47578	1.30181	0.678952	0.747436	0.949847	1.26195	0.690836	0.99008							3.85091	4.10008	5.75986	3.29203	5.90924	4.81566	2.60591	1.5409	4.05921	3.18158							7.00089	8.69981	3.95836	2.76571	7.21193	2.43363	8.38679	2.7713	7.28484	7.61434							4.48477
Mthfd2	0.742692	0.744498	0.594799	0.790164	0.93695	0.812013	0.929477	0.905456	1.02379	2.52016							4.92531	4.3677	4.18687	5.17006	4.65513	5.04638	5.50307	2.34529	6.13645	5.15189							6.74269	5.20289	7.08444	4.57516	12.1031	7.65697	9.53843	5.5432	11.757	12.1556							3.13337
[truncated: 8 more columns]
