# Supplementary material for: Tissue-specific responses to TFAM and mtDNA copy number manipulation in prematurely ageing mice
Source: eLife. 2025 Jun 30;14:RP104461. doi: 10.7554/eLife.104461 (PMC12208663; doi:10.7554/eLife.104461)
Supplement: Figure 6—source data 1. [file elife-104461-fig6-data1.xlsx]

## Sheet: 6.A
	Polg+/+Tfam+/+																PolgA-/mutTfam+/+																PolgA-/mutTfam+/OE																PolgA-/mutTfam+/-
mt-Nd1	0.748188	1.15011	1.10654	0.974329	1.02083												1.07883	0.76275	0.92786	0.969755	0.854453												1.16942	0.958811	1.38224	1.23361	1.2262	1.16663	0.81325										1.26112
mt-Atp6	0.834392	1.19403	1.06103	0.946496	0.964057												0.992367	0.795223	0.886211	0.978034	0.752597												0.93841	0.725845	1.21069	1.06502	0.928705	1.02644	0.746772										1.11516
mt-CytB	0.731928	1.15633	1.06471	1.03153	1.0155												0.929932	0.663156	0.833683	0.929735	0.697797												0.884007	0.566821	1.027	1.09231	1.09641	0.98653	0.884666										1.09034
[truncated: 4 more columns]

## Sheet: 6.C
	Polg+/+Tfam+/+																PolgA-/mutTfam+/+																PolgA-/mutTfam+/OE																PolgA-/mutTfam+/-
Ucp1	0.741502	1.28182	1.13596	1.41886	0.5641	0.85777											0.235804	0.29885		0.223812	0.379104	0.312996											0.272077	0.0115641	0.0442958	0.150126	0.261504	0.525122	0.176461										0.473497
Cidea	0.925304	0.992385	0.969426	0.875641	1.07985	1.0827											0.833628	0.476757		0.786271	1.05843	1.0921											0.670178	0.601119	0.658489	0.787135	0.989318	1.35258	0.796969										1.35978
Dio2	1.74363	0.870372	0.259804	0.805981	1.42257	0.897639											0.125557	0.310882		0.391588	0.128388	0.241252											0.0307806	0.00294355	0.00380228	0.0194228	0.144707	0.533346	0.0430867										0.0511598
[truncated: 4 more columns]
