# Supplementary material for: Tissue-specific responses to TFAM and mtDNA copy number manipulation in prematurely ageing mice
Source: eLife. 2025 Jun 30;14:RP104461. doi: 10.7554/eLife.104461 (PMC12208663; doi:10.7554/eLife.104461)
Supplement: Figure 7—figure supplement 1—source data 1. [file elife-104461-fig7-figsupp1-data1.xlsx]

## Sheet: Fig7Supp1.A
IFNγ
Polg+/+Tfam+/+	Polg-/mutTfam+/+	Polg-/mutTfam+/OE	Polg-/mutTfam+/-
0.28	1.37	11.82	1.96
0.58	3.73	1.79	17.37
	0.28	2.84	2.47
	1.37	0.58	1.93
	27.01	2.14	0.7
		1.05
0.58	21.64	2.63	0.86
0.95	0.58	0.49
		1.09
	0.51	0.07
	4.75
	1.42
		2.66
		2.14

## Sheet: Fig7Supp1.B
IL-3
Polg+/+Tfam+/+	Polg-/mutTfam+/+	Polg-/mutTfam+/OE	Polg-/mutTfam+/-
0.79	0.2	0.22	1.24
1.24	1.32		0.93
0.36	0.22		1.32
0.11	0.11		1.1
		0.26	0.4
0.08	0.15	0.1
0.24	0.22	0.04
0.86		0.43
	2.98	0.5
0.79	6.36
0.45	0.13
0.79	0.73
1.26		0.68
0.01		0.75

## Sheet: Fig7Supp1.C
TNFα
Polg+/+Tfam+/+	Polg-/mutTfam+/+	Polg-/mutTfam+/OE	Polg-/mutTfam+/-
1.76	4.41	5.53	17.82
4.24	5.27	7.26	3.2
3.9	4.63	3.32	12.44
6.49	6.88	7.22	4.57
5.53	24.85	3.2	4.19
4.84	1.97	5.32
3.79	6.04	2.83	5.63
4.9	5.16	7.07
15.18		6.54
4.95	14.51	1.46
5.78	10.64
5.89	5.73	6.44
5.22	0.17	8.11
5.84		3.32
4.46		2.64

## Sheet: Fig7Supp1.D
MIP-1α
Polg+/+Tfam+/+	Polg-/mutTfam+/+	Polg-/mutTfam+/OE	Polg-/mutTfam+/-
42.11	54.65	58.91	51.39
57.8	69.2	109.48	235.7
36.03	27.94	78.86	57.8
41.77	32.94	65.1	41.77
34.12	256.59	59.47	38.24
22.81	35.27	43.46
33.73	236.76	38.96	48.94
41.77	39.32	51.39
24.75		41.77
43.13	55.23	34.51
39.68	87.83	96.48
32.94	28.38	38.96
29.24	36.41	24.28
34.12		47.69
37.51		36.78

## Sheet: Fig7Supp1.E
IL-2
Polg+/+Tfam+/+	Polg-/mutTfam+/+	Polg-/mutTfam+/OE	Polg-/mutTfam+/-
3.61	6.94	1.28	8.73
8.27	11.93	22.34	86.97
3.92	0.43	16.22	6.4
5.86	2.75	7.8	6.24
1.67	164.23	7.1	3.99
2.06	5	4.54
2.91	51.8	5.31	6.79
2.52	4.3	4.93
6.56		2.21
7.8	5.08	3.3
3.22	15.28	18.81
4.38	5.16	5.86
4.69	4.54	2.6
3.45		4.3
1.44		4.69

## Sheet: Fig7Supp1.F
IL-12p70
Polg+/+Tfam+/+	Polg-/mutTfam+/+	Polg-/mutTfam+/OE	Polg-/mutTfam+/-
9.06	39.85	12.31	60.79
3.15	44.76	17.62	61.65
14.08	16.15	21.16	10.54
16.15	17.92	44.47	22.33
13.49	492.57	10.83	9.36
9.06	8.17	8.47
5.51	114.75	13.49	12.6
14.67	11.13	11.13
51.65		6.4
14.38	3.44	22.33
10.54	98.83	11.13
5.81	18.21	27.03
2.26	11.13	27.91
34.62		13.49
12.01		10.54

## Sheet: Fig7Supp1.G
KC
Polg+/+Tfam+/+	Polg-/mutTfam+/+	Polg-/mutTfam+/OE	Polg-/mutTfam+/-
45.61	141.95	66.17	92.01
65.94	18.33	74.56	63.27
98.44	81.4	71.28	180.57
52.31	131.85	149.95	90.8
80.26	219.42	62.88	92.92
83.37	45.76	46.53
176.26	144.87	43.45	16.51
59.59	79.8	69.83
77.75		66.17
4.53	79.2	32.98
69.38	88.98	93.83
88.38	80.03	122.24
34.62	54.38	27.13
25.88		86.03
70.9		20.38

## Sheet: Fig7Supp1.H
IL-13
Polg+/+Tfam+/+	Polg-/mutTfam+/+	Polg-/mutTfam+/OE	Polg-/mutTfam+/-
6.71	6.33	6.41	12.07
6.16	14.37	10.15	12.07
5.31	7.43	6.71	8.11
5.56	7.69	8.28	7.3
4.12	26.21	6.33	6.03
6.07	4.88	7.35
5.44	18.81	6.67	6.37
5.56	6.67	5.18
7.13		6.11
4.63	5.56	5.94
6.2	4.71	7.86
4.97	6.45	5.14
5.73	6.07	5.14
5.56		6.84
5.82		5.99
