# Supplementary material for: Tissue-specific responses to TFAM and mtDNA copy number manipulation in prematurely ageing mice
Source: eLife. 2025 Jun 30;14:RP104461. doi: 10.7554/eLife.104461 (PMC12208663; doi:10.7554/eLife.104461)
Supplement: Figure 7—source data 1. [file elife-104461-fig7-data1.xlsx]

## Sheet: 7.A
	Polg+/+Tfam+/+																PolgA-/mutTfam+/+																PolgA-/mutTfam+/OE																PolgA-/mutTfam+/-
mt-Nd1	1.13496	1.03515	0.342903	1.07458	1.1208	1.29159											3.35577	3.16541	3.82581	4.3865	2.85169	3.83695											3.837	3.15809	4.0573	4.05722	3.34253	2.62928	4.293										4.16716
mt-Atp6	1.26271	1.1034	0.260202	1.10681	1.04232	1.22457											2.70119	2.64269	3.03456	3.08871	2.31893	2.97208											2.99089	2.22681	2.86404	2.93253	2.50798	2.67834	3.28502										3.13167
mt-CytB	1.15918	1.00367	0.326861	1.13313	1.11778	1.25937											2.23066	2.16216	2.45376	2.42738	1.84791	2.36085											2.29413	1.7434	2.46956	2.3349	2.04801	2.18987	2.68335										2.29541
[truncated: 4 more columns]

## Sheet: 7.C
IL-5						CCL2 (MCP-1)
Polg+/+Tfam+/+	Polg-/mutTfam+/+	Polg-/mutTfam+/OE	Polg-/mutTfam+/-			Polg+/+Tfam+/+	Polg-/mutTfam+/+	Polg-/mutTfam+/OE	Polg-/mutTfam+/-
2.97	5.04	3.95	7.35			34.86	97.97	51.21	128.47
3.62	3.82	1.97	6.13			49.49	54.19	47.3	67.23
5.64	13.91	2.09	9.73			69.2	66.44	26.79	153.2
5.17	5.58	5.08	4.65			49.49	61.23	59.19	52.92
3.08	16.6	2.29	5.1			19.04	123.62	63.65	39.14
1.16	2.85	1.12				26.79	23.57	68.02
2.59	19.24	2.63	5.49			38.67	66.84	59.19	64.46
5.26	4.18	3.76				45.08	50.35	22.46
10.42		3.4				72.3		35.34
1.89	4.47	3.56				23.57	158.05	24.11
1.46	14.61	5.04				19.04	90.88	10.08
3.03	4.5					45.97	61.23	40.07
0.63	3.23	3.08				48.18	36.78	49.05
0.26		3.27				39.61		52.92
2.79		2.32				38.67		42.37

## Sheet: 7.D
	Polg+/+Tfam+/+																PolgA-/mutTfam+/+																PolgA-/mutTfam+/OE																PolgA-/mutTfam+/-
Il-5	0.592503	0.913032	0.535798	1.92427	1.63399	0.400408		1.43907	1.07431	0.591984	1.30962	0.988658	0.59636				3.70783	3.09644	3.88109	3.21083	2.70388	3.63481		2.90627	2.68415	2.30561	3.59005	2.32352	2.84753				2.3551	2.76703	2.47564	2.45658	2.69125	2.41622	1.35296	1.74851	1.19747	3.16873	1.4983	2.58634	2.89409	2.7218			3.17022
Ccl2	1.018	0.902045	0.847743	0.933387	1.17025	1.12858		1.07996	0.759357	0.925946	0.98836	0.97215	1.27423				1.47205	0.86647	1.20964	1.82357	1.09341	1.14465		1.26353	1.75122	1.39231	1.28626	1.14522	0.967379				0.928467	1.14046	0.717684	1.25145	0.750767	1.34872	0.991927	1.25136	0.939332	1.30765	1.53765	1.04661	1.19105	1.31124			1.07022
[truncated: 9 more columns]

## Sheet: 7.E
	Polg+/+Tfam+/+																PolgA-/mutTfam+/+																PolgA-/mutTfam+/OE																PolgA-/mutTfam+/-
Tbx21	0.881248	0.80668	0.815707	1.05983	1.37187	1.06467											0.233717	0.209599	0.391747	0.443478	0.396351	0.367584											0.309646	0.378697	0.356613	0.501049	0.444389	0.378281	0.427434										0.509543
Gata3	1.10298	0.776633	0.758181	0.858146	1.28073	1.22333											0.192753	0.277084	0.221953	0.282802	0.284772	0.224091											0.231565	0.236695	0.263673	0.308465	0.415541	0.315129	0.257719										0.359155
Rorc	1.03302	1.10997	0.735422	0.946926	1.04021	1.13445											0.347519	0.172154	0.437103	0.509669	0.518275	0.467928											0.405908	0.516089	0.380847	0.953805	0.638366	0.489038	0.431947										0.787924
Foxp3	0.793301	0.802638	0.988478	1.08399	1.22942	1.10217											0.0726704	0.0698826	0.106183	0.15257	0.142252	0.112215											0.11526	0.140491	0.146839	0.166511	0.163031	0.162838	0.154286										0.187115
Cebpe	0.272245	0.632382	0.418974	1.19362	1.03372	2.44906											22.4982	21.8707	15.5863	27.5704	38.9886	27.6135											42.6662	44.7425	40.9493	28.8351	36.8457	39.5087	33.4184										21.3575
[truncated: 4 more columns]
